# Supplementary material for: Activation of TRPV2 and BKCa channels by the LL-37 enantiomers stimulates calcium entry and migration of cancer cells
Source: PubMed Central journal article supplement (PMC5029663; doi:10.18632/oncotarget.8122), 2016-03-16
Supplement: oncotarget-07-23785-s001.pdf [file oncotarget-07-23785-s001.pdf]

## Activation of TRPV2 and BKCa channels by the LL-37 enantiomers stimulates calcium entry and migration of cancer cells

### Supplementary Materials

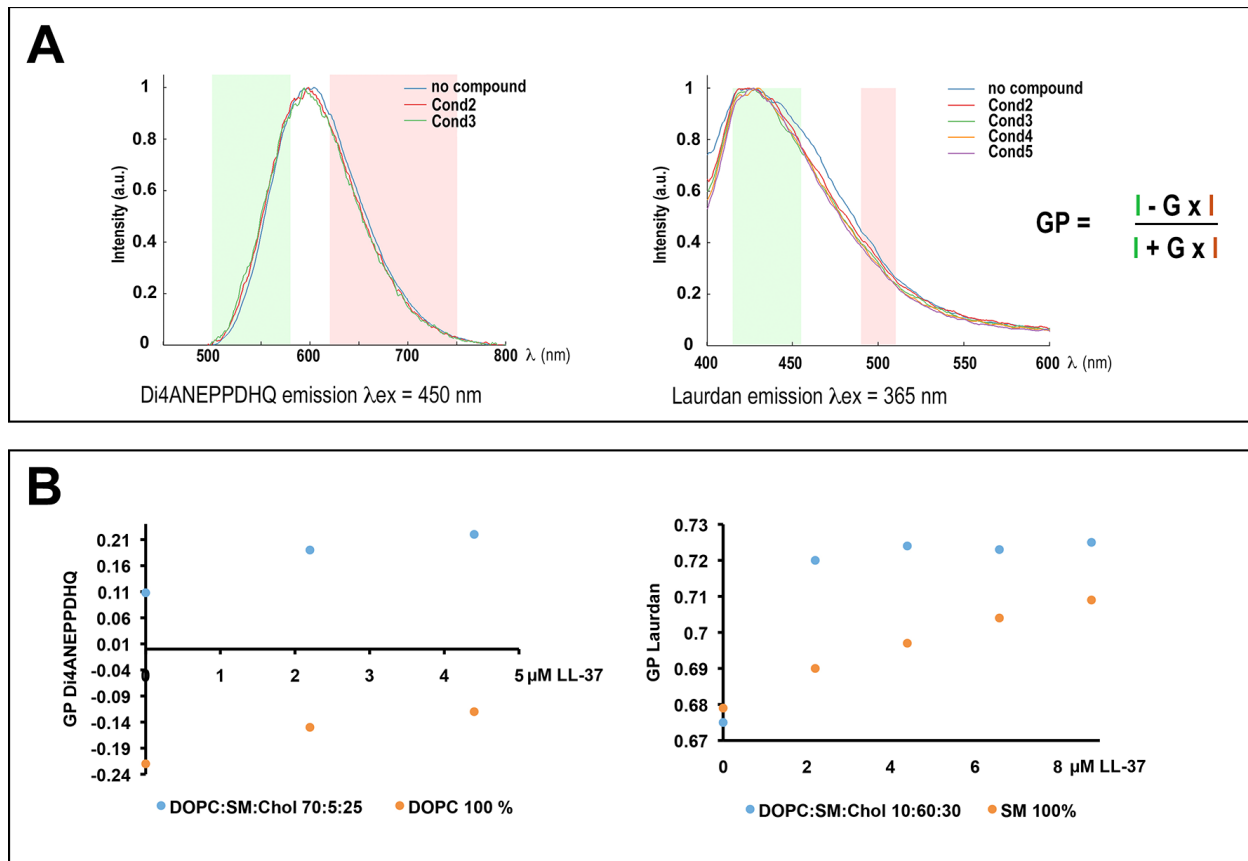

#### Supplementary Figure S1: LL37 increases the GP values in Large Unilamellar Vesicles in all lipid phase states.

Large Unilamellar Vesicles of 100 nm diameter were prepared at a 150  $\mu$ M concentration with different % lipid molar ratio of: 1, 2-Dioleoyl-sn-glycero-3-phosphocholine (DOPC), cholesterol (Chol), and egg sphingomyelin (SM, containing  $\approx$ 86% N-palmitoyl SM) in order to get liquid ordered/gel (DOPC:SM:Chol 10:60:30/SM 100%) or liquid disordered/fluid (DOPC:SM:Chol 70:5:25/ DOPC 100%) phase state. All compositions were incubated with Laurdan or Di4ANEPPDHQ at a Lipid/Probe = 300 molar ratio. The changes in the GP value were calculated in all conditions after addition of increasing concentrations of LL37 using the equation reported in graph (A) and shown in graph (B) The average for each condition is shown for both probes with a SEM  $\pm$  0.01.

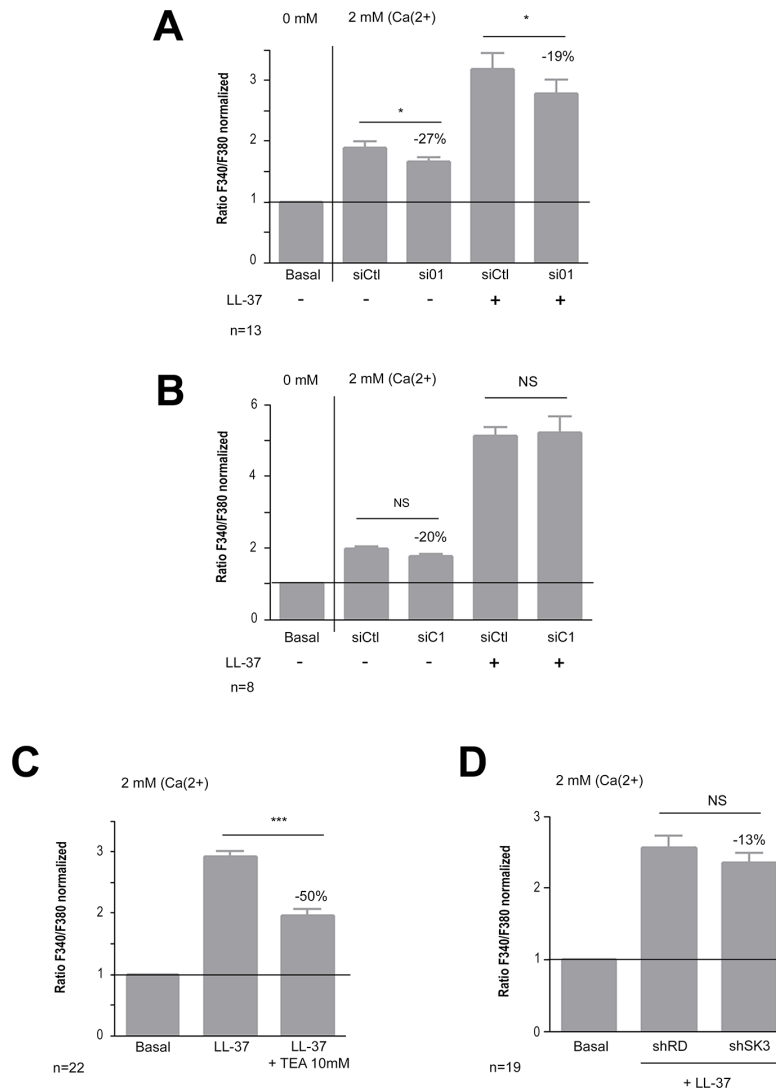

**Supplementary Figure S2: LL-37 increases intracellular Ca<sup>2+</sup> independent of Orai1 and TRPC1 channels but dependent of K<sup>+</sup> channels in MDA-MB-435s cells.** (A) When shifting the extracellular Ca<sup>2+</sup> from 0 to 2 mM after 20 s of measurement without depletion of the intracellular store, siRNA against Orai1 (siO1) decreases constitutive Ca<sup>2+</sup> entry and LL-37-induced Ca<sup>2+</sup> influx in the same manner. Fura-2 fluorescent ratio is normalized against the basal level of each experiment. The line shows the normalized basal level and the inhibitory effect of siO1 is indicated relative to control siRNA (siCtl) in the same condition. (B) siRNA against TRPC1 (siC1) decreases constitutive Ca<sup>2+</sup> entry but has no effect on LL-37-induced Ca<sup>2+</sup> influx. Evaluation performed as above. (C) LL-37-induced Ca<sup>2+</sup> influx is decreased when K<sup>+</sup> channels are inhibited by TEA using a constant external 2 mM Ca<sup>2+</sup>. The dotted line shows the normalized basal level and TEA inhibitory effect is indicated relative to LL-37.

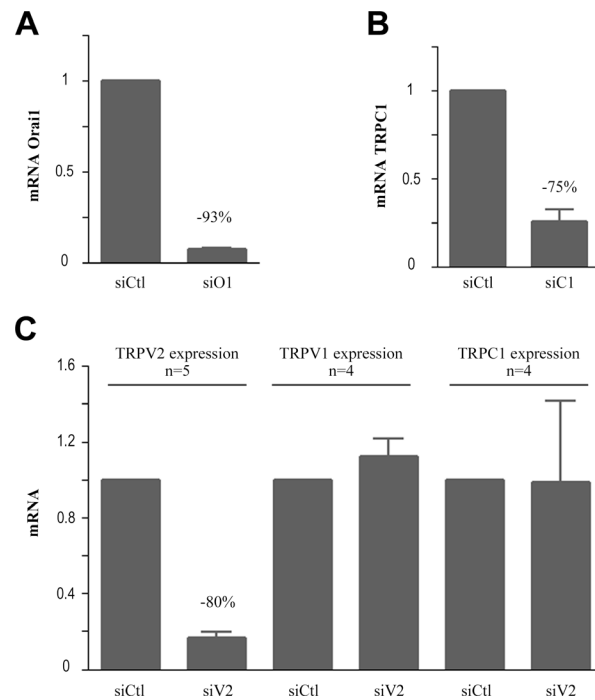

**Supplementary Figure S3: Efficiency of siRNA on expression of Orai1, TRPC1 and TRPV2 as measured by qRT-PCR of transfected MDA-MB-435s cells.** (A) siRNA against Orai1 (siO1) decreases mRNA expression level of Orai1 by 93%. (B) siRNA against TRPC1 (siC1) decreases mRNA expression level of TRPC1 by 75%. (C) siRNA against TRPV2 (siV2) decreases mRNA expression level of TRPV2 by 80% but has no effect on mRNA expression levels of TRPV1 and TRPC1. mRNA expression levels are evaluated by RT-qPCR as described in Materials and Methods.

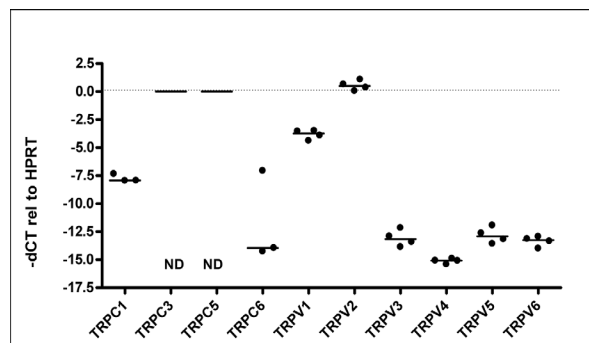

**Supplementary Figure S4: mRNA expression of TRPC/TRPV family members in MDA-MB-435s cells as determined by qRT-PCR.** Values are displayed as relative (-dCt) to the HPRT housekeeping gene.

**Supplementary Table S1: List of siRNAs used in this study**

| Target gene    | Target sequence (nt)                                    | Manufacturer/provider                                             |
|----------------|---------------------------------------------------------|-------------------------------------------------------------------|
| TRPC1          | 5'-CATGGAGCATCATATTTCA-3'                               | Eurogentec, Angers, France                                        |
| TRPC1 controls | 5'-GACTGACACAACCTGTATGA-3'<br>5'-CTTTCGGACTTCTAAATAT-3' |                                                                   |
| TRPC6          | 5'-CGTTCCTTTATGGAGTCTAT-3'                              |                                                                   |
| TRPC6 control  | 5'-GCAATGAACTGGCAGTTCT-3'                               |                                                                   |
| TRPV2          | 5'-GAACCTGCTTTACTATAACA-3'                              |                                                                   |
| TRPV2 controls | 5'-GTGATGATCTCGGACAACT-3'<br>5'-CACGTGTTTCATCTGGATCT-3' |                                                                   |
| Orai1          |                                                         | Santa Cruz Biotechnologies Heidelberg,<br>Germany,<br>cat c-76001 |
| scrambled      |                                                         | Qiagen, Courtaboeuf, France<br>cat 1027281                        |

**Supplementary Table S2: List of primers used for qRT-PCR**

| Gene  | Forward primer 5'-3'     | Reverse primer 5'-3'   |
|-------|--------------------------|------------------------|
| TRPC1 | TGGGATGATTTGGTCAGACA     | TCTGCCACCAGTGTAGGATG   |
| TRPC3 | CTTTCCTTCAGGCAACGAAG     | GTACGCAATCCGAGAGAAGC   |
| TRPC5 | CAACTGTCGTGGAATGGATG     | CCCTTGGACGAGAACCATA    |
| TRPC6 | GGATTACATGGGCCAGAATG     | GCTGGTTGCTAACCTCTTGC   |
| TRPV1 | CAACAAGATCGCACAGGAG      | TCCTTGCCATCAGGTGTGTA   |
| TRPV2 | GGAATACACAGAGGGCTCCA     | CCTCTTCTCAATGGCGATGT   |
| TRPV3 | ACGAGGCAACAACATCCTTC     | CCGCTTCTCCTTGATCTCAG   |
| TRPV4 | CCCGTGAGAACACCAAGTTT     | AGTTCATTGATGGGCTCCAC   |
| TRPV5 | GGAGCTTGTGGTCTCCTCTG     | GAAACTTAAGGGGGCGGTA    |
| TRPV6 | TCAAGCCCAGGACCAATAAC     | GTCCAAAGAAGCGAGTGACC   |
| ORAI1 | CTGATCATGAGCGCAAACAG     | ATGGTGGCAATGGTGGAG     |
| HPRT1 | TGACCTTGATTTATTTTGCATACC | CGAGCAAGACGTTTCAGTCCCT |

**Supplementary Table S3: List of antibodies and conditions of use in this study**

| Primary antibodies                      |                                                         |                                                                                       |
|-----------------------------------------|---------------------------------------------------------|---------------------------------------------------------------------------------------|
| Target protein, position, species       | Manufacturer/provider                                   | Method and dilution                                                                   |
| TRPV2, 3rd extracellular loop, rabbit   | antibodies-online.com,<br>cat ABIN351263                | Immunofluorescence, 1/300 electron<br>microscopy: 1/100<br>Immunohistochemistry: 1/50 |
| BKCa, extracellular, rabbit             | Alomone Laboratories, Jerusalem, Israel,<br>cat APC 107 | Immunofluorescence: 1/200<br>electron microscopy 1/100                                |
| LL-37 whole peptide, rabbit             | Osenses, Keswick, Australia,<br>cat. OSC00030P          | Immunofluorescence: 1/500 electron<br>microscopy: 1/200                               |
| phosphoAKT (Ser473), rabbit             | Cell signaling/Ozyme, cat 4060                          | Western blot: 1/1000                                                                  |
| panAKT, mouse                           | Cell signaling/Ozyme, cat 2920                          | Western blot: 1/1500                                                                  |
| Secondary antibodies                    |                                                         |                                                                                       |
| CF488A chicken anti-rabbit              | Biotium, cat 20209                                      | Immunofluorescence: 1/2000                                                            |
| Gold-conjugated (6 nm) goat anti-rabbit | Aurion, cat 806.011                                     | electron microscopy: 1/30                                                             |
| Goat anti-rabbit IgG-HRP                | Santa Cruz, cat sc-2004                                 | Western blot: 1/4000                                                                  |
| Goat anti-mouse IgG-HRP                 | Santa Cruz, cat sc-2005                                 | Western blot: 1/4000                                                                  |

**Supplementary Table S4: List of inhibitors used in this study**

| <b>Inhibitor</b>                                          | <b>Manufacturer/provider</b>           | <b>concentration</b> |
|-----------------------------------------------------------|----------------------------------------|----------------------|
| Iberiotoxin (Ibtx)                                        | Santa Cruz, Cat sc-3585                | 50 nM                |
| Lanthanum(III) chloride heptahydrate (LaCl <sub>3</sub> ) | Sigma-Aldrich, cat 262072              | 100 μM               |
| Sodium azide (NaN <sub>3</sub> )                          | Sigma-Aldrich, cat S8302               | 1%                   |
| KN62                                                      | Calbiochem/Merck-Millipore, cat 422706 | 100 nM               |
| LY-2940042 hydrochloride                                  | Sigma Aldrich, cat L9908               | 1 μM                 |
| Wortmannin                                                | Calbiochem/Merck-Millipore, cat 681676 | 100 nM               |
| UO126                                                     | Calbiochem/Merck-Millipore             | 1 μM                 |
| Tetraethylammonium chloride (TEA)                         | Sigma-Aldrich, cat T2265               | 10 mM                |
